# Supplementary material for: Owned-Dog Demographics, Ownership Dynamics, and Attitudes across Three States of India
Source: MDPI journal article supplement (doi:10.3390/ani14101464), 2024-05-14
Supplement: s1 [file s1]

# Supplementary Material

**Table S1.** Survey questions across Indian settlements. Each row represents a set of questions compared for the purposes of this study, with answer options given in *italics*. Note that not all questions are identical across settlements.

| Ahmedabad                                                                                                                                                                                                                                                                                                                                                                          | Vadodara                                                                                                                                                                                   | Jamnagar                                            | Nainital                  | Mussoorie      | Kodaikanal                        | Coimbatore                          |                                                              |
|------------------------------------------------------------------------------------------------------------------------------------------------------------------------------------------------------------------------------------------------------------------------------------------------------------------------------------------------------------------------------------|--------------------------------------------------------------------------------------------------------------------------------------------------------------------------------------------|-----------------------------------------------------|---------------------------|----------------|-----------------------------------|-------------------------------------|--------------------------------------------------------------|
| What is your gender?                                                                                                                                                                                                                                                                                                                                                               |                                                                                                                                                                                            |                                                     |                           |                |                                   |                                     |                                                              |
| <div>- Male</div> <div>- Female</div>                                                                                                                                                                                                                                                                                                                                              |                                                                                                                                                                                            |                                                     |                           |                |                                   |                                     |                                                              |
| Interviewer evaluation: Economic situation of the household <div>- Slum/Temporary Housing</div> <div>- Low Income Class</div> <div>- Medium Income Class</div> <div>- High Income Class</div>                                                                                                                                                                                      | Interviewer evaluation: Type of Household                                                                                                                                                  |                                                     |                           |                |                                   |                                     |                                                              |
|                                                                                                                                                                                                                                                                                                                                                                                    | <div>- Apartment</div> <div>- Semi-detached House</div> <div>- Detached House</div>                                                                                                        |                                                     |                           |                |                                   |                                     |                                                              |
| How many dogs do you own currently?                                                                                                                                                                                                                                                                                                                                                |                                                                                                                                                                                            |                                                     | How many dogs do you own? |                |                                   | How many dogs do you own currently? |                                                              |
| Numeric                                                                                                                                                                                                                                                                                                                                                                            |                                                                                                                                                                                            |                                                     |                           |                |                                   |                                     |                                                              |
| What is the sex of the dog?                                                                                                                                                                                                                                                                                                                                                        |                                                                                                                                                                                            |                                                     |                           | Sex of the dog |                                   | What is the sex of the dog?         |                                                              |
| <div>- Male</div> <div>- Female</div>                                                                                                                                                                                                                                                                                                                                              |                                                                                                                                                                                            |                                                     |                           |                |                                   |                                     |                                                              |
| Where did you get her/him from?                                                                                                                                                                                                                                                                                                                                                    |                                                                                                                                                                                            |                                                     |                           |                |                                   |                                     |                                                              |
| <div>- Adopted (from shelter)</div> <div>- Adopted (from someone in neighbourhood)</div> <div>- Adopted (from street)</div> <div>- Bought (from in neighbourhood)</div> <div>- Bought (from outside neighbourhood)</div> <div>- Gift (from inside neighbourhood)</div> <div>- Gift (from outside neighbourhood)</div> <div>- Pup of my own dog</div> <div>- Other/Don't know</div> |                                                                                                                                                                                            |                                                     |                           |                |                                   |                                     |                                                              |
| Why do you own dog(s)? (Multiple answers could be chosen)                                                                                                                                                                                                                                                                                                                          |                                                                                                                                                                                            |                                                     |                           |                |                                   |                                     |                                                              |
| <div>- Pet/Companion</div> <div>- Breeding</div> <div>- I want him/her to protect the property/crops</div> <div>- Hunting</div>                                                                                                                                                                                                                                                    |                                                                                                                                                                                            |                                                     |                           |                |                                   |                                     |                                                              |
|                                                                                                                                                                                                                                                                                                                                                                                    | Why don't you own a dog?                                                                                                                                                                   |                                                     |                           |                |                                   |                                     |                                                              |
|                                                                                                                                                                                                                                                                                                                                                                                    | <div>- I owned a dog but not currently</div> <div>- I don't like dogs</div> <div>- It is against my religious beliefs</div> <div>- No need for a dog</div> <div>- No space for a dog</div> |                                                     |                           |                |                                   |                                     |                                                              |
|                                                                                                                                                                                                                                                                                                                                                                                    |                                                                                                                                                                                            |                                                     |                           |                |                                   |                                     |                                                              |
| Where is the dog at night?                                                                                                                                                                                                                                                                                                                                                         |                                                                                                                                                                                            |                                                     |                           |                |                                   |                                     |                                                              |
| <div>- Free/roaming/loose outside</div> <div>- In the house</div> <div>- Tethered outside</div>                                                                                                                                                                                                                                                                                    |                                                                                                                                                                                            |                                                     |                           |                |                                   |                                     |                                                              |
|                                                                                                                                                                                                                                                                                                                                                                                    | Was the dog vaccinated against rabies in the last 12 months?                                                                                                                               | Has your dog been vaccinated in the last 12 months? |                           |                | Vaccinated in the last 12 months? |                                     | Was the dog vaccinated against rabies in the last 12 months? |

|                                                                                                                                                                                                                                                                                                                                        |                                                                                      |                                                                                              |                                                          |
|----------------------------------------------------------------------------------------------------------------------------------------------------------------------------------------------------------------------------------------------------------------------------------------------------------------------------------------|--------------------------------------------------------------------------------------|----------------------------------------------------------------------------------------------|----------------------------------------------------------|
|                                                                                                                                                                                                                                                                                                                                        |                                                                                      | - Yes<br>- No                                                                                |                                                          |
| Is this dog sterilized?                                                                                                                                                                                                                                                                                                                |                                                                                      | Is the dog neutered?                                                                         |                                                          |
|                                                                                                                                                                                                                                                                                                                                        |                                                                                      | - Yes<br>- No                                                                                |                                                          |
| Why is your dog not sterilized?                                                                                                                                                                                                                                                                                                        | Why don't you want your dog to be sterilized?                                        | Why don't you want your dog to be neutered?                                                  | Why is your dog not sterilized?                          |
| - Not necessary<br>- I don't have time<br>- Too expensive/I don't have the money<br>- I don't know where to have it sterilized<br>- I don't want my dog to become lazy<br>- I want my dog to protect my property<br>- I want to have puppies<br>- It is against my religious beliefs<br>- Too dangerous for the dogs<br>- I don't know |                                                                                      |                                                                                              |                                                          |
| Have you been to the veterinarian in the last 12 months?                                                                                                                                                                                                                                                                               |                                                                                      | Have you been to the vet in the last 12 months?                                              | Have you been to the veterinarian in the last 12 months? |
| - Yes<br>- No                                                                                                                                                                                                                                                                                                                          |                                                                                      |                                                                                              |                                                          |
| Has anyone in the household been bitten by a dog in the last 12 months?                                                                                                                                                                                                                                                                |                                                                                      |                                                                                              |                                                          |
| - Yes<br>- No                                                                                                                                                                                                                                                                                                                          |                                                                                      |                                                                                              |                                                          |
| By which type of dog?                                                                                                                                                                                                                                                                                                                  |                                                                                      |                                                                                              | What type of dog was it?                                 |
| - Neighbour's dog<br>- Own household dog<br>- Unowned dog (in [settlement name])<br>- Unidentified strange dog                                                                                                                                                                                                                         |                                                                                      |                                                                                              |                                                          |
| How many years have you been a dog owner?                                                                                                                                                                                                                                                                                              |                                                                                      |                                                                                              |                                                          |
| - Numeric (years)                                                                                                                                                                                                                                                                                                                      |                                                                                      |                                                                                              |                                                          |
| Is this (or one of them if more than one dog) the first dog you own?                                                                                                                                                                                                                                                                   |                                                                                      |                                                                                              |                                                          |
| - Yes<br>- No                                                                                                                                                                                                                                                                                                                          |                                                                                      |                                                                                              |                                                          |
|                                                                                                                                                                                                                                                                                                                                        | Considering [the number of street dogs], what do you think about the number of dogs? | What do you think about the number of dogs?                                                  |                                                          |
|                                                                                                                                                                                                                                                                                                                                        |                                                                                      | - Far too few<br>- Too few<br>- Not too few and not too many<br>- Too many<br>- Far too many |                                                          |
| Street dogs are a danger to people where I live                                                                                                                                                                                                                                                                                        |                                                                                      |                                                                                              |                                                          |
| - Strongly agree<br>- Agree<br>- I don't know<br>- Disagree<br>- Strongly disagree                                                                                                                                                                                                                                                     |                                                                                      |                                                                                              |                                                          |
| Street dogs are a part of my community and are not a problem                                                                                                                                                                                                                                                                           |                                                                                      |                                                                                              |                                                          |
| - Strongly agree<br>- Agree<br>- I don't know                                                                                                                                                                                                                                                                                          |                                                                                      |                                                                                              |                                                          |

|                                                                                                             |                                                                                                                                                                                                                                                                               |                                                |                                                        |
|-------------------------------------------------------------------------------------------------------------|-------------------------------------------------------------------------------------------------------------------------------------------------------------------------------------------------------------------------------------------------------------------------------|------------------------------------------------|--------------------------------------------------------|
| <div>- Disagree</div> <div>- Strongly disagree</div>                                                        |                                                                                                                                                                                                                                                                               |                                                |                                                        |
| How frequently (in a week's time) would you say you feel threatened by street dogs you meet on the streets? |                                                                                                                                                                                                                                                                               |                                                | How frequently would you say street dogs threaten you? |
| <div>- Never</div> <div>- Rarely</div> <div>- Sometimes</div> <div>- Often</div> <div>- Always</div>        |                                                                                                                                                                                                                                                                               |                                                |                                                        |
|                                                                                                             | Do you think street dogs should be managed and if so how?                                                                                                                                                                                                                     |                                                |                                                        |
|                                                                                                             | <div>- I don't know</div> <div>- No, leave them alone / They are okay and don't bother anyone</div> <div>- Sterilize, vaccinate and return them to the their street</div> <div>- Remove, shelter and adopt them</div> <div>- Euthanasia/killing/just take them all away</div> |                                                |                                                        |
|                                                                                                             | Street dogs should be removed                                                                                                                                                                                                                                                 | Street dogs should be removed from the streets | Street dogs should be removed                          |
|                                                                                                             | <div>- Strongly agree</div> <div>- Agree</div> <div>- I don't know</div> <div>- Disagree</div> <div>- Strongly disagree</div>                                                                                                                                                 |                                                |                                                        |
|                                                                                                             | Do you feed street dogs?                                                                                                                                                                                                                                                      |                                                |                                                        |
| <div>- Every day</div> <div>- Once a week</div> <div>- Several times a month</div> <div>- Never</div>       |                                                                                                                                                                                                                                                                               |                                                |                                                        |

**Table S2.** Census data for Indian settlements. Data drawn from: 2011 census (Government of India, 2011); \* = estimates provided by municipalities at time of survey.

| Settlement | Survey Date | State       | Settlement Type | Human Population | Households (HH) |
|------------|-------------|-------------|-----------------|------------------|-----------------|
| Ahmedabad  | Aug-19      | Gujarat     | Metro-Urban     | 7,322,403*       | 1,594,105*      |
| Vadodara   | Nov-17      | Gujarat     | Urban           | 1,752,371        | 376,276         |
| Jamnagar   | Oct-17      | Gujarat     | Semi-Urban      | 600,943          | 117,798         |
| Coimbatore | Jul-17      | Tamil Nadu  | Urban           | 1,890,000*       | 282,839         |
| Kodaikanal | Jun-17      | Tamil Nadu  | Semi-Urban      | 36,501           | 9,570           |
| Mussoorie  | Jul-17      | Uttarakhand | Semi-Urban      | 30,118           | 6,245           |
| Nainital   | Jul-17      | Uttarakhand | Semi-Urban      | 41,377           | 9,329           |

**Table S3.** Count data of dog owning households by household type; sample sizes given in brackets.

| Settlement | N    | Apartment | Semi-detached house | Detached house | Slum/temporary housing | Low-income class | Middle-income class | Upper-income class |
|------------|------|-----------|---------------------|----------------|------------------------|------------------|---------------------|--------------------|
| Ahmedabad  | 5633 | -         | -                   | -              | 6 (498)                | 42 (2000)        | 70 (2747)           | 12 (388)           |
| Coimbatore | 432  | 8 (75)    | 30 (168)            | 49 (189)       | -                      | -                | -                   | -                  |
| Jamnagar   | 409  | 4 (106)   | 11 (265)            | 4 (38)         | -                      | -                | -                   | -                  |
| Kodaikanal | 369  | 3 (15)    | 17 (109)            | 69 (245)       | -                      | -                | -                   | -                  |
| Mussoorie  | 297  | 1 (7)     | 24 (156)            | 19 (134)       | -                      | -                | -                   | -                  |
| Nainital   | 328  | 5 (51)    | 44 (194)            | 13 (83)        | -                      | -                | -                   | -                  |
| Vadodara   | 2350 | 27 (620)  | 58 (1325)           | 45 (405)       | -                      | -                | -                   | -                  |

**Table S4.** Count data of dog acquisition sources. Question not asked in Coimbatore.

| Settlement | N   | Adopted | Born to household | Bought | Received as a gift | Other |
|------------|-----|---------|-------------------|--------|--------------------|-------|
| Ahmedabad  | 154 | 46      | 7                 | 72     | 26                 | 3     |
| Coimbatore | NA  | -       | -                 | -      | -                  | -     |
| Jamnagar   | 20  | 1       | 0                 | 10     | 9                  | 0     |
| Kodaikanal | 101 | 17      | 18                | 41     | 23                 | 2     |
| Mussoorie  | 44  | 3       | 4                 | 24     | 13                 | 0     |
| Nainital   | 69  | 38      | 0                 | 20     | 11                 | 0     |
| Vadodara   | 136 | 20      | 10                | 78     | 28                 | 0     |

**Table S5.** Count data of reasons for dog ownership. Note that multiple responses could be given by each respondent. Question not asked in Coimbatore.

| Settlement | N   | Pet/ companion | Property/ crop protection | Hunting | Breeding |
|------------|-----|----------------|---------------------------|---------|----------|
| Ahmedabad  | 132 | 124            | 15                        | 0       | 1        |
| Coimbatore | NA  | -              | -                         | -       | -        |
| Jamnagar   | 18  | 18             | 3                         | 0       | 0        |
| Kodaikanal | 101 | 80             | 33                        | 1       | 9        |
| Mussoorie  | 44  | 26             | 28                        | 0       | 1        |
| Nainital   | 62  | 34             | 50                        | 0       | 1        |
| Vadodara   | 130 | 121            | 34                        | 0       | 0        |

**Table S6.** Count data of sterilisation, vaccination and vet visit counts for owned dogs. Sample sizes given in brackets. Vaccination status and vet visits were not investigated in Ahmedabad and Coimbatore respectively.

| Settlement | Sterilised | Sterilised (female) | Sterilised (male) | Vaccinated (last 12 months) | Vet visit (last 12 months) |
|------------|------------|---------------------|-------------------|-----------------------------|----------------------------|
| Ahmedabad  | 52 (147)   | 23 (65)             | 29 (82)           | -                           | 119 (154)                  |

|            |          |         |         |           |           |
|------------|----------|---------|---------|-----------|-----------|
| Coimbatore | 24 (121) | 8 (37)  | 16 (83) | 92 (122)  | -         |
| Jamnagar   | 1 (19)   | 1 (6)   | 0 (13)  | 15 (17)   | 7 (20)    |
| Kodaikanal | 20 (101) | 5 (42)  | 15 (57) | 66 (100)  | 57 (101)  |
| Mussoorie  | 4 (28)   | 1 (5)   | 3 (23)  | 31 (39)   | 31 (44)   |
| Nainital   | 30 (69)  | 16 (23) | 14 (46) | 52 (60)   | 52 (69)   |
| Vadodara   | 50 (131) | 11 (39) | 39 (92) | 126 (132) | 102 (136) |

**Table S7.** Count data of dogs reported to be free roaming at night. Confinement practices were not investigated in Kodaikanal or Coimbatore.

| Settlement | N   | Free roaming<br>at night |
|------------|-----|--------------------------|
| Ahmedabad  | 154 | 13                       |
| Jamnagar   | 20  | 1                        |
| Mussoorie  | 21  | 0                        |
| Nainital   | 69  | 39                       |
| Vadodara   | 136 | 5                        |

**Table S8.** Count data of dog bite incidences concerning respondent or individuals within respondent's household in the last 12 months

| Settlement | N    | Total bites | Own dog | Neighbour's<br>dog | Unidentified/<br>unknown dog |
|------------|------|-------------|---------|--------------------|------------------------------|
| Ahmedabad  | 5660 | 535         | 8       | 19                 | 508                          |
| Coimbatore | 432  | 16          | 4       | 3                  | 9                            |
| Jamnagar   | 409  | 24          | 2       | 2                  | 20                           |
| Kodaikanal | 369  | 33          | 1       | 9                  | 23                           |
| Mussoorie  | 297  | 14          | 0       | 7                  | 7                            |
| Nainital   | 328  | 9           | 0       | 1                  | 8                            |
| Vadodara   | 2350 | 145         | 8       | 14                 | 123                          |
